# Supplementary material for: Protein and functional isoform levels and genetic variants of the BAFF and APRIL pathway components in systemic lupus erythematosus
Source: PubMed Central journal article supplement (PMC9250527; doi:10.1038/s41598-022-15549-0), 2022-07-02
Supplement: 41598_2022_15549_MOESM1_ESM.pdf [file 41598_2022_15549_MOESM1_ESM.pdf]

**SI. Figure 1. Flowchart with number of samples collected from each specimen and available in each assay**

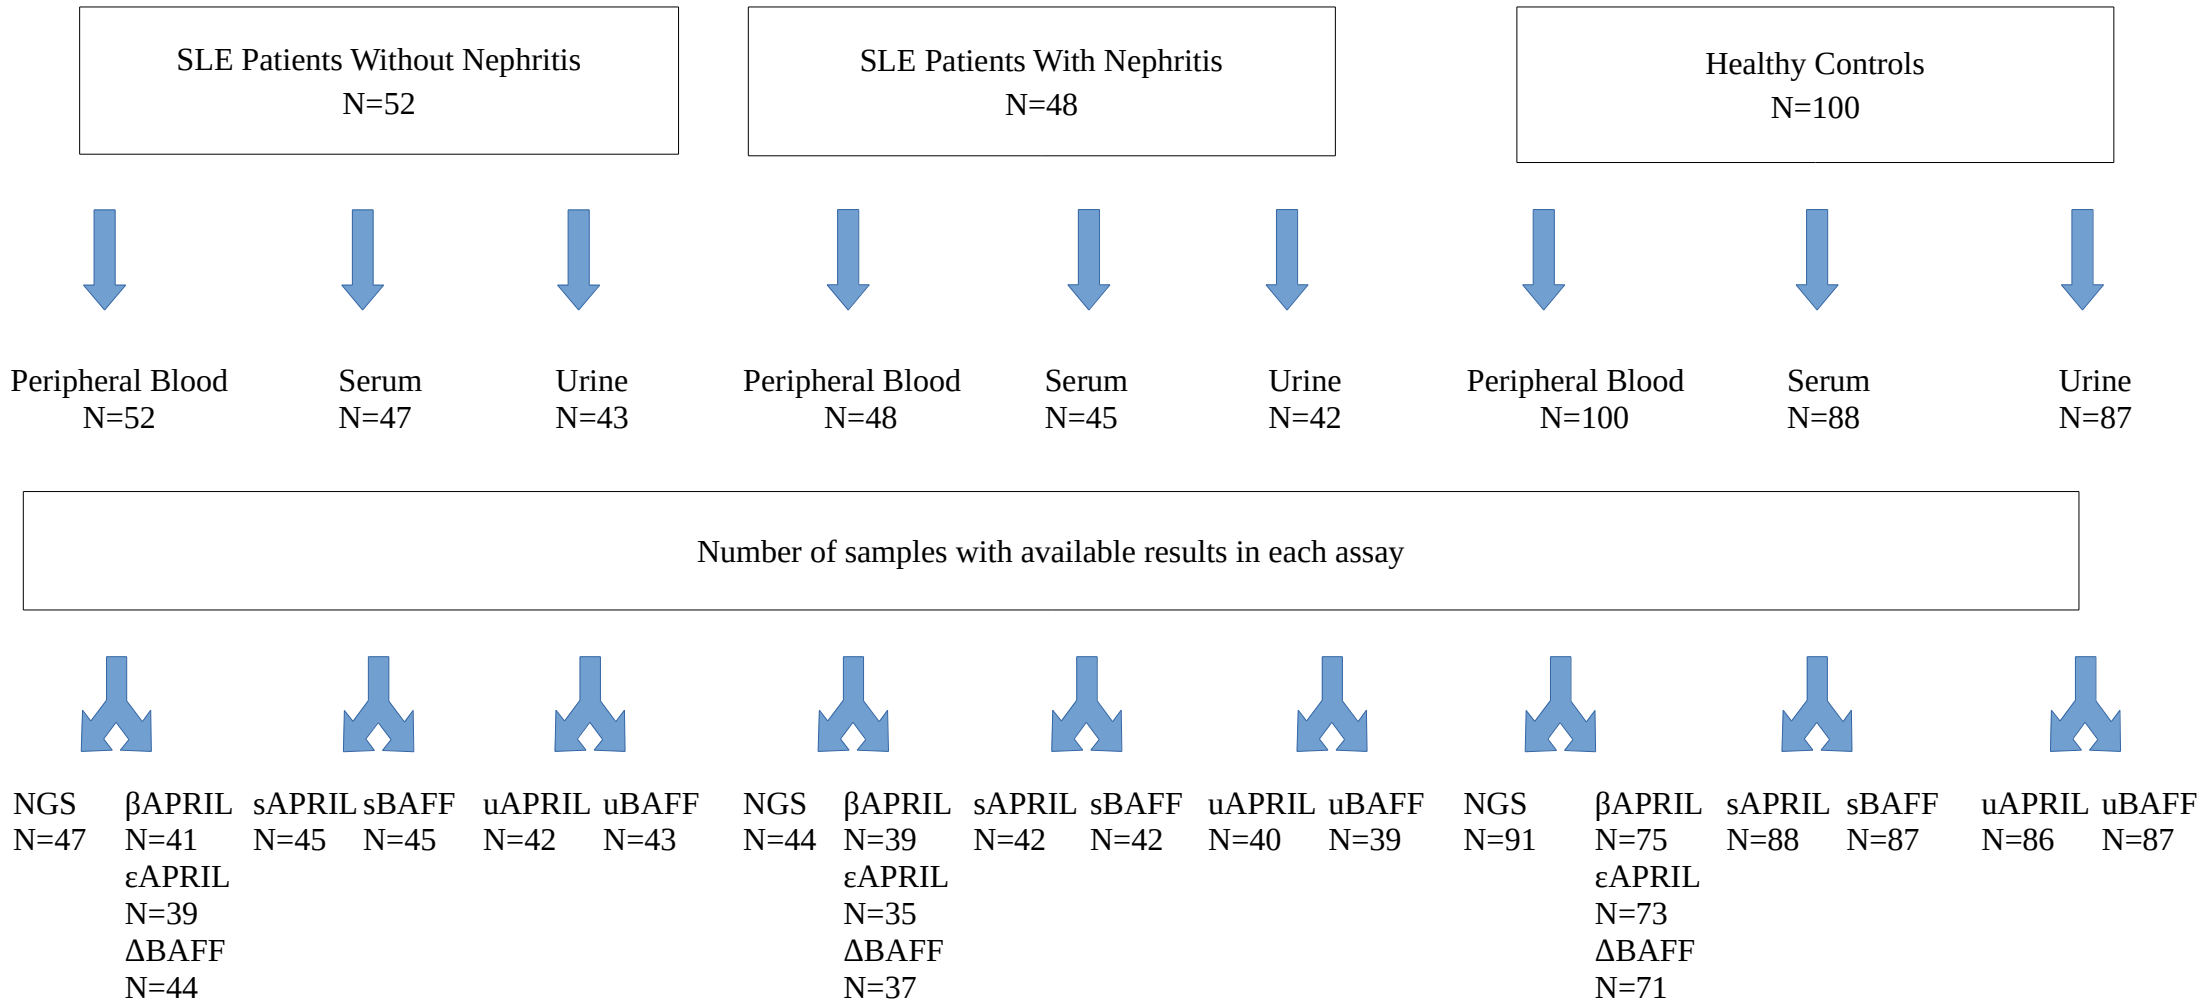

DNA and RNA were extracted from peripheral blood. DNA was used in Next Generation Sequencing (NGS) to study the variants in the genes of the cytokines and their receptor. RNA was used to quantify different functional isoforms of APRIL and BAFF.

Serum and urine samples were used to quantify the cytokines.

The number of individuals included in the correlation analysis (with available data in all the assays) was: patients without nephritis N=32, with nephritis N=29, healthy controls N=51

## SI. Figure 2. TaqMan Gene Expression Assays for $\Delta$ BAFF and $\beta$ and $\epsilon$ APRIL

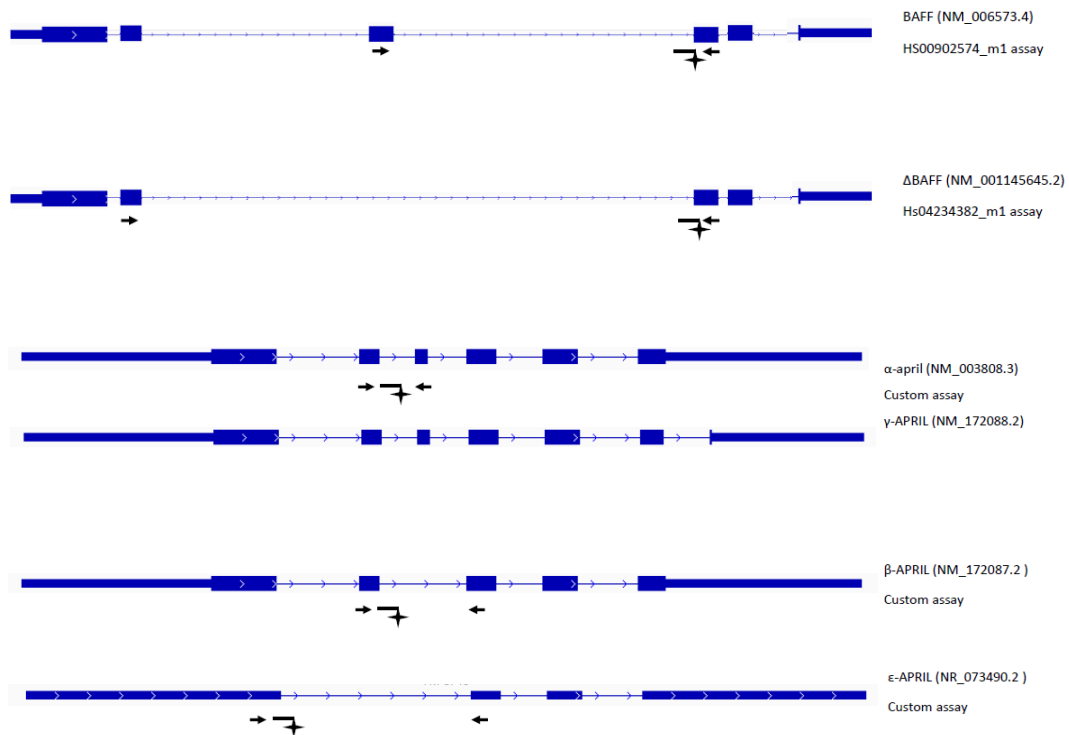

Concerning BAFF, the mRNA expression levels of the isoform  $\Delta$ BAFF (mRNA-expression of isoform 2, NM\_001145645.2) were relativized to the isoform 1 (NM\_006573.4) used as reference. In the case of APRIL, the mRNA expression levels of the isoforms  $\beta$  and  $\epsilon$  ( $\beta$ APRIL, NM\_172087.2 and  $\epsilon$ APRIL, NR\_073490.2) were referenced to the functional isoforms  $\alpha$  and  $\gamma$  ( $\alpha$ APRIL, NM\_003808.3 and  $\gamma$ APRIL, NM\_172088.2). The figure shows the location of the primers and probes in each assay, designed at the junctions of the corresponding exons (BAFF exons 3-4,  $\Delta$ BAFF exons 2-4,  $\alpha$  and  $\gamma$ APRIL exons 2-3,  $\beta$ APRIL exon 2-4 and  $\epsilon$ APRIL exons 1-3).

**SI Figure 3. Levels of sBAFF (2a) and sAPRIL (2b) in patients with and without nephritis.**

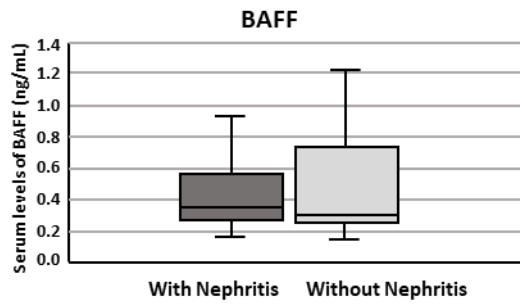

**SI Figure 3a**

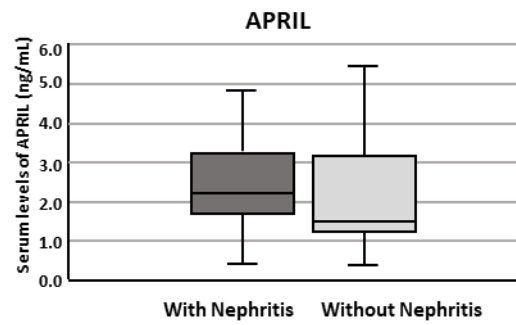

**SI Figure 3b**

Median sBAFF: Patients with nephritis 0.34, IQR 0.28 Vs. patients without 0.34, IQR 0.47;  $p > 0.05$

Median sAPRIL: Patients with nephritis 2.21, IQR 1.57 Vs. patients without 1.51, IQR 2.0;  $p > 0.05$

**SI Figure 4. Levels of sBAFF (3a) and APRIL (3b) in patients with and without dsDNA antibodies.**

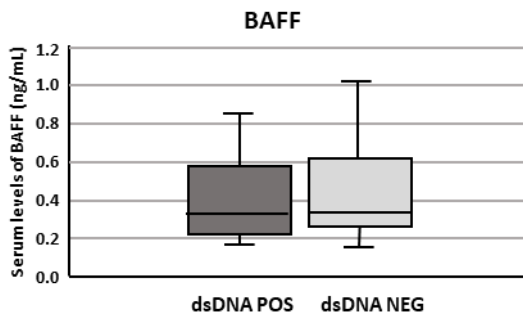

**SI Figure 4a**

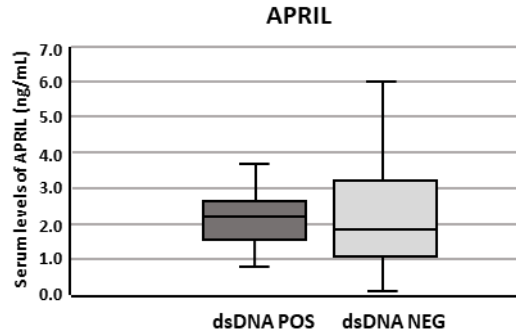

**SI Figure 4b**

Median sBAFF patients with dsDNA antibodies 0.34, IQR 0.33 Vs. patients without 0.34, IQR 0.36;  $p > 0.05$

Median sAPRIL in patients with dsDNA antibodies 2.19, IQR 0.96 Vs. patients without 1.93, IQR 2.1;  $p > 0.05$

**SI Figure 5. Levels sBAFF (4a) and APRIL (4b) in patients stratified according their activity index score (SLEDAI).**

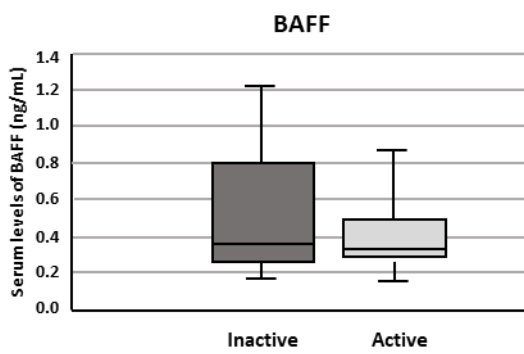

**SI Figure 5a**

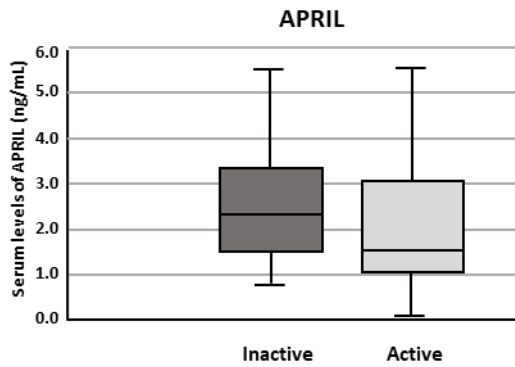

**SI Figure 5b**

Median levels of sBAFF in patients with an active 0.33, IQR 0.39 and an inactive disease 0.34, IQR 0.32;  $p>0.05$

Median levels of sAPRIL in patients with an active 2.21, IQR 1.44 and an inactive disease sAPRIL 1.78, IQR 2.12;  $p>0.05$

SI Figure 6. Number of variants in each gene and classification according to their MAF

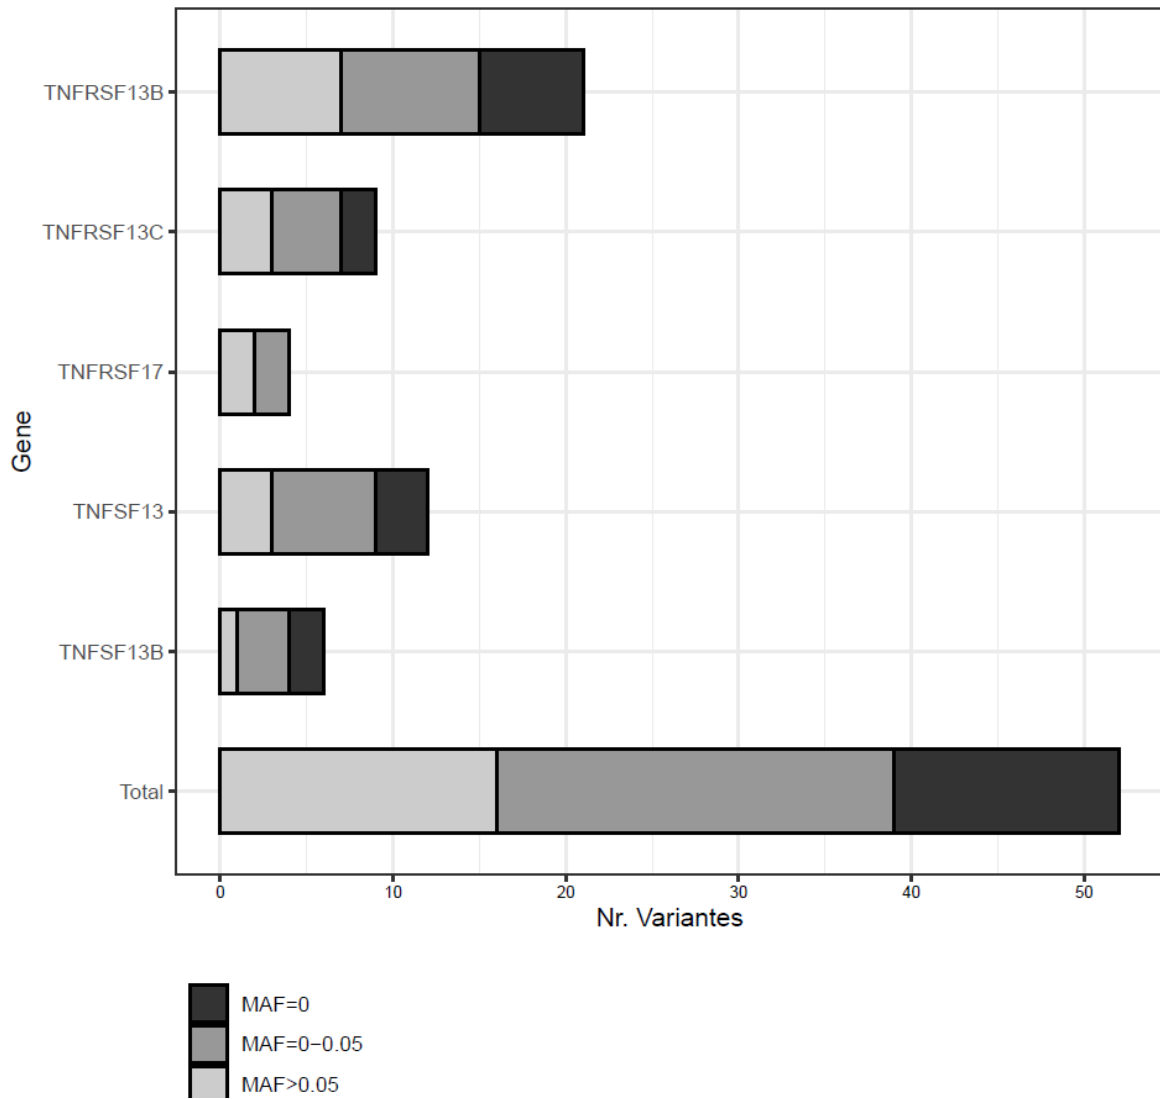

## Supplementary information.

### SI Table 1. List and description of the genetic variants found in the study

| VARIANT                        | ID           | TYPE  | ALLELES PATIENTS | ALLELES CONTROLS | MAF (1KG ALL)   | MAF (1KG IBS) | ACMG CLASSIFICATION |
|--------------------------------|--------------|-------|------------------|------------------|-----------------|---------------|---------------------|
| TNFSF13B_SER42PHE              | rs145253799  | SNV   | 1                |                  | 0 0.0031948881  | NA            | Likely Bening       |
| TNFSF13B_c.340-45C>G           | rs56124946   | SNV   | 8                |                  | 3 0.069488816   | 0.028037382   | Bening              |
| TNFSF13B_THR143ALA             | rs752513510  | SNV   | 0                |                  | 1 NA            | NA            | VUS                 |
| TNFSF13B_c.482-26C>T           | rs73611024   | SNV   | 3                |                  | 0 0.02755591    | NA            | VUS                 |
| TNFSF13B_ARG231ARG             | -            | SNV   | 0                |                  | 1 NA            | NA            | Likely Bening       |
| TNFSF13B_c.746-61A>C           | rs61972017   | SNV   | 4                |                  | 3 0.0075878594  | 0.046728972   | Likely Bening       |
| TNFRSF17_ASN81SER              | rs373496     | SNV   | 176              |                  | 171 0.961262    | 0.9953271     | Bening              |
| TNFRSF17_c.277+103G>A          | rs11570150   | SNV   | 2                |                  | 2 0.0041932906  | 0.009345794   | Likely Bening       |
| TNFRSF17_THR159THR             | rs2017662    | SNV   | 11               |                  | 13 0.13977636   | 0.046728972   | Bening              |
| TNFRSF17_THR175THR             | rs2071336    | SNV   | 6                |                  | 9 0.059305113   | 0.028037382   | Bening              |
| TNFRSF13B_c.*175delG           | -            | INDEL | 0                |                  | 3 NA            | NA            | VUS                 |
| TNFRSF13B_c.*173G>A            | rs56153623   | SNV   | 71               |                  | 66 0.41873002   | 0.317757      | Bening              |
| TNFRSF13B_c.*86_*88delTGA      | rs150068036  | INDEL | 2                |                  | 6 NA            | NA            | Bening              |
| TNFRSF13B_SER277SER            | rs11078355   | SNV   | 79               |                  | 77 0.5952476    | 0.40654206    | Bening              |
| TNFRSF13B_THR266ILE            | rs752825527  | SNV   | 0                |                  | 1 NA            | NA            | VUS-LP              |
| TNFRSF13B_PRO251LEU            | rs34562254   | SNV   | 21               |                  | 15 0.19069488   | 0.10280374    | Bening              |
| TNFRSF13B_VAL220ALA            | rs56063729   | SNV   | 0                |                  | 4 0.0053913738  | 0.028037382   | Bening              |
| TNFRSF13B_c.632-60T>C          | rs11652811   | SNV   | 60               |                  | 60 0.10323483   | 0.27102804    | Bening              |
| TNFRSF13B_ARG202HIS            | rs104894649  | SNV   | 1                |                  | 0 0.00019968051 | NA            | Likely Pathogenic   |
| TNFRSF13B_c.445+144A>G         | rs4517836    | SNV   | 57               |                  | 56 0.10003994   | 0.24299066    | Bening              |
| TNFRSF13B_c.445+31T>A          | rs55955502   | SNV   | 1                |                  | 1 0.0017971246  | NA            | VUS                 |
| TNFRSF13B_c.445+25A>C          | rs2274892    | SNV   | 84               |                  | 76 0.40634984   | 0.38317758    | VUS                 |
| TNFRSF13B_CYS104ARG            | rs34557412   | SNV   | 2                |                  | 4 0.0017971246  | NA            | Pathogenic          |
| TNFRSF13B_PRO97PRO             | rs35062843   | SNV   | 5                |                  | 7 0.048522364   | 0.06542056    | Bening              |
| TNFRSF13B_ILE87ASN             | rs72553877   | SNV   | 2                |                  | 1 0.00019968051 | NA            | Likely Pathogenic   |
| TNFRSF13B_ARG72HIS             | rs55916807   | SNV   | 0                |                  | 1 0.0021964856  | 0.014018691   | Likely Bening       |
| TNFRSF13B_LEU69THRfsTer12      | rs72553875   | INDEL | 0                |                  | 1 NA            | NA            | Pathogenic          |
| TNFRSF13B_c.200-70C>T          | rs537951875  | SNV   | 1                |                  | 0 NA            | NA            | VUS                 |
| TNFRSF13B_c.200-84_200-83delTT | rs67234667   | INDEL | 5                |                  | 8 0.048722044   | 0.06542056    | Bening              |
| TNFRSF13B_MET31THR             | rs757910034  | SNV   | 1                |                  | 0 NA            | NA            | VUS-LP              |
| TNFRSF13B_THR27THR             | rs8072293    | SNV   | 119              |                  | 118 0.8995607   | 0.7570093     | Likely Bening       |
| TNFSF13_ALA47ALA               | rs376426219  | SNV   | 0                |                  | 1 NA            | NA            | Likely Bening       |
| TNFSF13_GLY67ARG               | rs11552708   | SNV   | 18               |                  | 6 0.13777955    | 0.11682243    | Bening              |
| TNFSF13_GLY75GLY               | rs12942687   | SNV   | 0                |                  | 1 0.0117811505  | 0.004672897   | Bening              |
| TNFSF13_ASN96SER               | rs3803800    | SNV   | 143              |                  | 142 0.5597045   | 0.7570093     | Bening              |
| TNFSF13_ARG101ARG              | rs772960491  | SNV   | 1                |                  | 0 NA            | NA            | Likely Bening       |
| TNFSF13_c.337+55G>A            | rs72827563   | SNV   | 1                |                  | 2 0.0029952077  | NA            | Likely Bening       |
| TNFSF13_c.338-61G>A            | rs143094271  | SNV   | 3                |                  | 3 0.004592652   | 0.018691588   | Likely Bening       |
| TNFSF13_c.505-20_505-18delACA  | rs58840546   | INDEL | 12               |                  | 11 0.1269968    | 0.10747664    | Bening              |
| TNFSF13_ARG206TRP              | rs201011600  | SNV   | 1                |                  | 0 NA            | NA            | VUS                 |
| TNFSF13_c.*69T>C               | rs74875436   | SNV   | 1                |                  | 0 0.036541533   | NA            | Bening              |
| TNFSF13_c.*75T>C               | rs372917746  | SNV   | 1                |                  | 0 0.00019968051 | NA            | Likely Bening       |
| TNFSF13_c.*108G>A              | rs6607       | SNV   | 0                |                  | 2 0.0013977636  | NA            | Likely Bening       |
| TNFRSF13C_HIS159TYR            | rs61756766   | SNV   | 5                |                  | 1 0.0033945688  | 0.014018691   | Bening              |
| TNFRSF13C_c.368-33T>C          | rs5996087    | SNV   | 16               |                  | 14 0.14496805   | 0.07009346    | VUS                 |
| TNFRSF13C_c.367+89G>C          | rs73165134   | SNV   | 16               |                  | 11 0.067492016  | 0.06542056    | VUS                 |
| TNFRSF13C_LEU77LEU             | rs140820836  | SNV   | 0                |                  | 1 0.012579872   | NA            | Bening              |
| TNFRSF13C_GLY64VAL             | rs1556157858 | MNV   | 1                |                  | 0 NA            | NA            | Likely Bening       |
| TNFRSF13C_c.136+140G>A         | rs150150552  | SNV   | 0                |                  | 3 0.07767572    | 0.004672897   | Bening              |
| TNFRSF13C_c.136+116T>A         | rs868540681  | SNV   | 0                |                  | 1 NA            | NA            | VUS                 |
| TNFRSF13C_PRO21ARG             | rs77874543   | SNV   | 13               |                  | 9 0.044528753   | 0.06542056    | Bening              |
| TNFRSF13C_VAL20VAL             | rs373828157  | SNV   | 1                |                  | 0 0.00019968051 | NA            | Likely Bening       |

*ACMG American College of Medical Genetics and Genomics*

*MAF Minor Allele Frequency*

*VUS variant of uncertain significance*

*SNV Single Nucleotide Variant*

*INDEL Insertion/Deletion Variant*

*MNV MultiNucleotide Variant*

*IBS Iberian populations in Spain*
